# Supplementary material
Source: publisher site journal article supplement (https://www.kjim.org/upload/media/kjim-2021-338-suppl3.pdf)
Supplement: Supplementary file 1 [file kjim-2021-338-suppl3.pdf]

**Supplementary Table 3. The comparison of SF-36, PHES, and the rate correct scores in the Stroop test based on per-protocol analysis**

| Variable                                | Baseline         |                             | Week 24          |                             | Change of values (24 weeks–baseline) |                             |                             |
|-----------------------------------------|------------------|-----------------------------|------------------|-----------------------------|--------------------------------------|-----------------------------|-----------------------------|
|                                         | Value            | <i>p</i> value <sup>a</sup> | Value            | <i>p</i> value <sup>a</sup> | Within group difference              | <i>p</i> value <sup>a</sup> | <i>p</i> value <sup>b</sup> |
| <b>SF-36</b>                            |                  |                             |                  |                             |                                      |                             |                             |
| Physical component                      |                  | 0.460                       |                  | 0.380                       |                                      | 0.430                       |                             |
| Placebo                                 | 75 (68 to 82)    |                             | 77 (63 to 86)    |                             | 3 (–6 to 8)                          |                             | 0.410                       |
| L-carnitine                             | 71 (59 to 81)    |                             | 82 (68 to 86)    |                             | 5 (–1 to 13)                         |                             | 0.011                       |
| Mental component                        |                  | 0.840                       |                  | 0.850                       |                                      | 0.750                       |                             |
| Placebo                                 | 73 (60 to 85)    |                             | 76 (65 to 90)    |                             | 3 (–2 to 10)                         |                             | 0.038                       |
| L-carnitine                             | 76 (59 to 81)    |                             | 77 (68 to 82)    |                             | 7 (–3 to 12)                         |                             | 0.019                       |
| Total score                             |                  | 0.580                       |                  | 0.580                       |                                      | 0.530                       |                             |
| Placebo                                 | 75 (63 to 82)    |                             | 76 (65 to 87)    |                             | 4 (–3 to 9)                          |                             | 0.058                       |
| L-carnitine                             | 72 (59 to 81)    |                             | 79 (67 to 86)    |                             | 4 (–1 to 12)                         |                             | 0.004                       |
| <b>PHES</b>                             |                  |                             |                  |                             |                                      |                             |                             |
| Total score                             |                  | 0.350 <sup>c</sup>          |                  | 0.760 <sup>c</sup>          |                                      | 0.340 <sup>c</sup>          |                             |
| Placebo                                 | –2 (–5 to –1)    |                             | –1 (–3 to 1)     |                             | 1 (–1 to 3)                          |                             | 0.068 <sup>d</sup>          |
| L-carnitine                             | –4 (–6 to 0)     |                             | –2 (–4 to 1)     |                             | 2 (–1 to 3)                          |                             | < 0.001 <sup>d</sup>        |
| MHE                                     |                  | 0.430 <sup>e</sup>          |                  | 0.780 <sup>e</sup>          |                                      | 0.710 <sup>f</sup>          |                             |
| Placebo                                 | 9/32 (28.1)      |                             | 5/32 (15.6)      |                             | 5/9 (55.6)                           |                             | 0.096 <sup>g</sup>          |
| L-carnitine                             | 12/32 (37.5)     |                             | 6/32 (18.8)      |                             | 7/12 (58.3)                          |                             | 0.025 <sup>g</sup>          |
| CHE                                     |                  | 0.300 <sup>e</sup>          |                  | 1.000 <sup>e</sup>          |                                      | 0.210 <sup>f</sup>          |                             |
| Placebo                                 | 29/32 (90.6)     |                             | 7/32 (21.9)      |                             | 22/29 (75.9)                         |                             | < 0.0001 <sup>g</sup>       |
| L-carnitine                             | 26/33 (78.8)     |                             | 8/33 (24.2)      |                             | 19/26 (73.1)                         |                             | < 0.0001 <sup>g</sup>       |
| <b>Stroop test (rate correct score)</b> |                  |                             |                  |                             |                                      |                             |                             |
| Color                                   |                  | 0.950                       |                  | 0.540                       |                                      | 0.730                       |                             |
| Placebo                                 | 2.8 (2.2 to 3.3) |                             | 3.0 (2.2 to 3.6) |                             | 0.4 (–0.2 to 0.82)                   |                             | 0.046                       |
| L-carnitine                             | 2.9 (2.0 to 3.6) |                             | 3.0 (2.1 to 3.7) |                             | 0.2 (–0.2 to 0.6)                    |                             | 0.100                       |
| Word                                    |                  | 0.910                       |                  | 0.540                       |                                      | 0.860                       |                             |
| Placebo                                 | 3.6 (3.2 to 4.0) |                             | 3.6 (3.0 to 3.8) |                             | –0.1 (–0.5 to 0.3)                   |                             | 0.560                       |
| L-carnitine                             | 3.6 (3.2 to 4.0) |                             | 3.5 (2.9 to 4.0) |                             | –0.1 (–0.4 to 0.2)                   |                             | 0.230                       |
| Inhibition                              |                  | 0.860                       |                  | 0.540                       |                                      | 0.160                       |                             |
| Placebo                                 | 2.4 (1.5 to 3.3) |                             | 2.4 (1.4 to 3.2) |                             | 0.2 (–0.8 to 0.6)                    |                             | 0.940                       |
| L-carnitine                             | 2.2 (1.5 to 3.1) |                             | 2.6 (1.8 to 3.3) |                             | 0.3 (–0.2 to 0.5)                    |                             | 0.032                       |
| Inhibition/Switching                    |                  | 0.740                       |                  | 0.680                       |                                      | 0.610                       |                             |
| Placebo                                 | 1.5 (1.0 to 2.1) |                             | 1.6 (1.2 to 2.5) |                             | 0.2 (–0.3 to 0.8)                    |                             | 0.110                       |
| L-carnitine                             | 1.5 (1.0 to 2.1) |                             | 1.7 (1.5 to 2.1) |                             | 0.1 (–0.3 to 0.6)                    |                             | 0.320                       |

Values are presented as median (interquartile range) or number (%).

SF-36, 36-Item Short Form Survey; PHES, psychometric hepatic encephalopathy score; MHE, minimal hepatic encephalopathy; CHE, covert hepatic encephalopathy.

<sup>a</sup>Comparison between the groups.

<sup>b</sup>Comparison within the groups.

<sup>c</sup>Independent *t* test or Wilcoxon rank sum test.

<sup>d</sup>Paired *t* test or Wilcoxon signed rank test.

<sup>e</sup>Chi-square test.

<sup>f</sup>Generalized Estimating Equations for the interaction effect of time × group.

<sup>g</sup>Generalized Estimating Equations for the time effect.
